# Supplementary material for: Twenty years of temporal change in perfluoroalkyl sulfonate and carboxylate contaminants in herring gull eggs from the Laurentian Great Lakes
Source: Royal Society of Chemistry journal article supplement (doi:10.1039/c1em10663e), 2011-01-01
Supplement: c1em10663e.pdf [file c1em10663e.pdf]

**Twenty Years of Temporal Changes in Perfluoroalkyl Sulfonate and Carboxylate  
Contaminants in Herring Gull Eggs from the Laurentian Great Lakes**

Wouter A. Gebbink<sup>†‡\*</sup>, Robert J. Letcher<sup>†‡\*</sup>, Craig E. Hebert<sup>†</sup>, D.V. Chip Weseloh<sup>§</sup>,

<sup>†</sup> National Wildlife Research Centre, Science and Technology Branch, Environment Canada,  
Carleton University, Ottawa, ON, K1A 0H3, Canada

<sup>‡</sup> Department of Chemistry, Carleton University, Ottawa, Ontario, K1S 5B6, Canada

<sup>§</sup> Canadian Wildlife Service, Environment Canada, Downsview, Ontario, M3H 5T4, Canada.

**SUPPLEMENTARY INFORMATION**

**Table S1.** Chemical structures of the target compounds and the internal standards used.

| Target Compound | Chemical Structure                                            | Internal Standard             |
|-----------------|---------------------------------------------------------------|-------------------------------|
| PFBS            | $\text{CF}_3(\text{CF}_2)_3\text{SO}_3^-$                     | PFHxA- $^{13}\text{C}_2$      |
| PFHxS           | $\text{CF}_3(\text{CF}_2)_5\text{SO}_3^-$                     | PFHxS- $^{18}\text{O}_2$      |
| PFOS            | $\text{CF}_3(\text{CF}_2)_7\text{SO}_3^-$                     | PFOS- $^{13}\text{C}_4$       |
| PFDS            | $\text{CF}_3(\text{CF}_2)_9\text{SO}_3^-$                     | PFUnA- $^{13}\text{C}_2$      |
| PFOSA           | $\text{CF}_3(\text{CF}_2)_7\text{SO}_2\text{NH}_2$            | PFOSA- $^{13}\text{C}_8$      |
| N-Me-FOSA       | $\text{CF}_3(\text{CF}_2)_7\text{SO}_2\text{NCH}_3\text{H}$   | d-N-Me-FOSA                   |
| PFHxA           | $\text{CF}_3(\text{CF}_2)_4\text{COOH}$                       | PFHxA- $^{13}\text{C}_2$      |
| PFHpA           | $\text{CF}_3(\text{CF}_2)_5\text{COOH}$                       | PFHxS- $^{18}\text{O}_2$      |
| PFOA            | $\text{CF}_3(\text{CF}_2)_6\text{COOH}$                       | PFOA- $^{13}\text{C}_4$       |
| PFNA            | $\text{CF}_3(\text{CF}_2)_7\text{COOH}$                       | PFNA- $^{13}\text{C}_5$       |
| PFDA            | $\text{CF}_3(\text{CF}_2)_8\text{COOH}$                       | PFDA- $^{13}\text{C}_2$       |
| PFUnA           | $\text{CF}_3(\text{CF}_2)_9\text{COOH}$                       | PFUnA- $^{13}\text{C}_2$      |
| PFDoA           | $\text{CF}_3(\text{CF}_2)_{10}\text{COOH}$                    | PFDoA- $^{13}\text{C}_2$      |
| PFTriA          | $\text{CF}_3(\text{CF}_2)_{11}\text{COOH}$                    | PFDoA- $^{13}\text{C}_2$      |
| PFTeA           | $\text{CF}_3(\text{CF}_2)_{12}\text{COOH}$                    | PFDoA- $^{13}\text{C}_2$      |
| PFPA            | $\text{CF}_3(\text{CF}_2)_{13}\text{COOH}$                    | PFDoA- $^{13}\text{C}_2$      |
| 6:2 FTUCA       | $\text{CF}_3(\text{CF}_2)_4\text{CFCH}_2\text{COOH}$          | 6:2 FTUCA- $^{13}\text{C}_2$  |
| 8:2 FTUCA       | $\text{CF}_3(\text{CF}_2)_6\text{CFCH}_2\text{COOH}$          | 8:2 FTUCA- $^{13}\text{C}_2$  |
| 10:2 FTUCA      | $\text{CF}_3(\text{CF}_2)_8\text{CFCH}_2\text{COOH}$          | 10:2 FTUCA- $^{13}\text{C}_2$ |
| 6:2 FTOH        | $\text{CF}_3(\text{CF}_2)_4\text{CF}(\text{CH}_2)_2\text{OH}$ | 6:2 FTOH- $^{13}\text{C}_2$   |
| 8:2 FTOH        | $\text{CF}_3(\text{CF}_2)_6\text{CF}(\text{CH}_2)_2\text{OH}$ | 8:2 FTOH- $^{13}\text{C}_2$   |
| 10:2 FTOH       | $\text{CF}_3(\text{CF}_2)_8\text{CF}(\text{CH}_2)_2\text{OH}$ | 10:2 FTOH- $^{13}\text{C}_2$  |

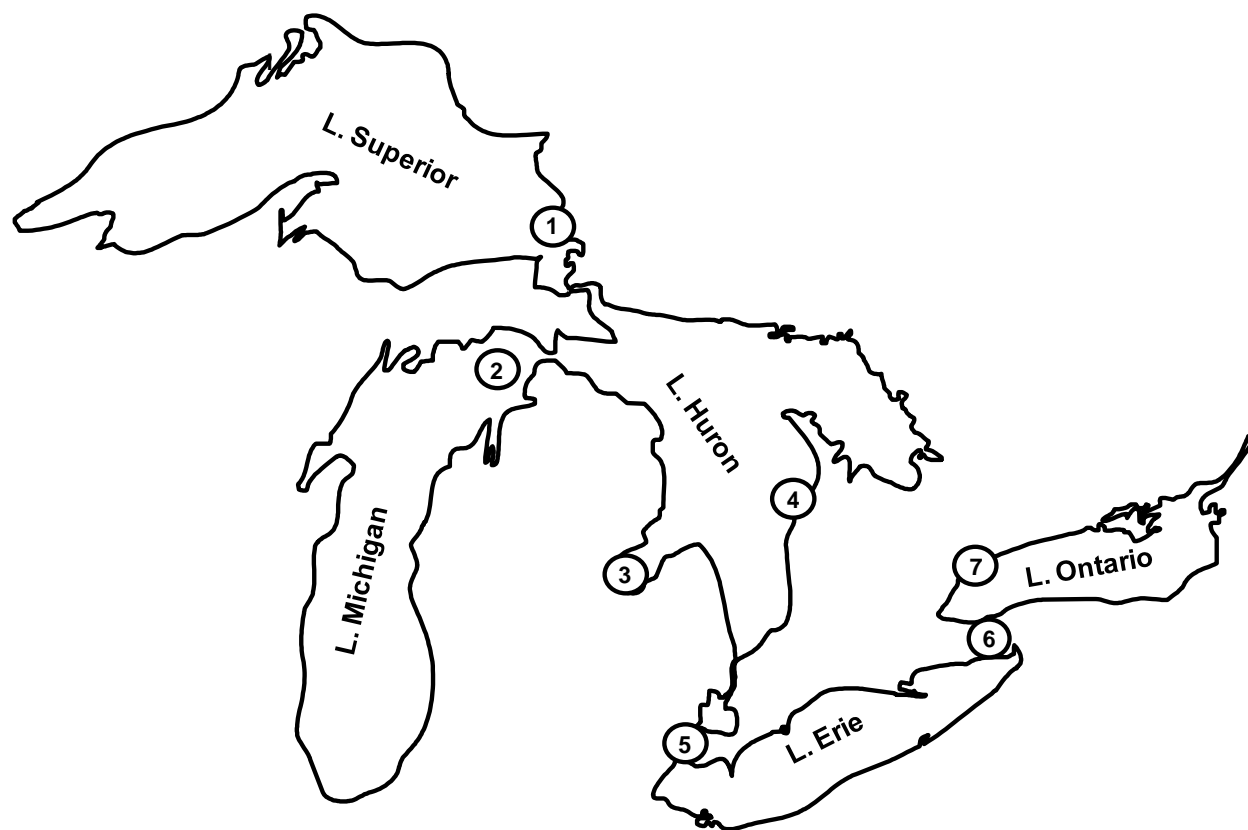

**Figure S1.** Location of the herring gull colonies throughout the Laurentian Great Lakes of North America: 1 Agawa Rocks, 2 Gull Island, 3 Channel-Shelter Island, 4 Chantry Island, 5 Fighting Island, 6 Niagara River, 7 Toronto Harbour.

**Table S2.** Average percent (range) of individual perfluorinated sulfonate (PFSA) to  $\Sigma$ PFSA concentrations and individual perfluorinated carboxylate (PFCA) to  $\Sigma$ PFCA concentrations in herring gull eggs, and temporal changes of percent PFSA and PFCA between 1990 and 2010<sup>a</sup>.

The bold the line separates the PFSA and PFCA compounds.

| PFC   |         | Colony           |                  |                       |                  |                  |                  |                  |
|-------|---------|------------------|------------------|-----------------------|------------------|------------------|------------------|------------------|
|       |         | Agawa Rocks      | Gull Is          | Channel-Shelter Is    | Chantry Is       | Fighting Is      | Niagara R        | Toronto Hbr      |
| PFHxS | Average | 0.23 (0–1.6)     | 0.22 (0.01–0.73) | 0 – 0.25 <sup>b</sup> | 0.15 (0–0.39)    | 0.17 (0–0.56)    | 0.11 (0–0.32)    | 0.34 (0.15–0.79) |
|       | r       | 0.070            | 0.094            |                       | -0.136           | -0.172           | -0.321           | -0.086           |
|       | p       | 0.80             | 0.74             |                       | 0.63             | 0.56             | 0.24             | 0.76             |
| PFOS  | Average | 98.1 (94.3–99.1) | 98.4 (96.8–99.2) | 94.0 (88.3–97.2)      | 97.2 (92.5–98.6) | 90.1 (79.8–97.1) | 98.2 (95.9–99.4) | 96.2 (88.2–99.2) |
|       | r       | 0.279            | 0.220            | <b>0.643</b>          | 0.407            | <b>0.600</b>     | 0.466            | <b>0.928</b>     |
|       | p       | 0.31             | 0.43             | <b>0.001</b>          | 0.13             | <b>0.02</b>      | 0.08             | <b>0.0001</b>    |
| PFDS  | Average | 1.7 (0.77–4.1)   | 1.4 (0.65–2.5)   | 6.0 (2.8–11.6)        | 2.7 (1.2–7.1)    | 9.7 (2.9–20.2)   | 1.7 (0.53–4.0)   | 3.4 (0.68–11.7)  |
|       | r       | -0.382           | -0.275           | <b>-0.634</b>         | -0.410           | <b>-0.597</b>    | -0.445           | <b>-0.921</b>    |
|       | p       | 0.16             | 0.32             | <b>0.01</b>           | 0.13             | <b>0.02</b>      | 0.10             | <b>0.0001</b>    |
| PFOA  | Average | 0.62 (0–1.6)     | 1.3 (0–3.7)      | 0 – 0.53              | 1.3 (0.07–3.2)   | 0 – 1.8          | 0 – 0.72         | 1.2 (0.27–2.2)   |
|       | r       | -0.269           | -0.464           |                       | -0.483           |                  |                  | <b>-0.632</b>    |
|       | p       | 0.33             | 0.08             |                       | 0.07             |                  |                  | <b>0.01</b>      |
| PFNA  | Average | 14.2 (9.7–18.7)  | 9.0 (2.5–14.8)   | 5.4 (2.1–11.0)        | 10.8 (5.7–20.3)  | 1.7 (0.47–4.6)   | 7.2 (3.7–11.6)   | 7.7 (4.4–11.6)   |
|       | r       | 0.320            | 0.110            | 0.106                 | <b>-0.715</b>    | 0.002            | 0.015            | -0.446           |
|       | p       | 0.24             | 0.70             | 0.71                  | <b>0.003</b>     | 0.99             | 0.96             | 0.10             |
| PFDA  | Average | 12.9 (10.3–17.3) | 15.5 (7.2–25.5)  | 15.6 (8.6–19.4)       | 12.2 (9.2–15.7)  | 13.3 (9.9–17.0)  | 20.9 (16.1–29.3) | 17.1 (14.2–21.6) |
|       | r       | -0.350           | -0.443           | <b>0.568</b>          | 0.137            | <b>0.739</b>     | 0.419            | <b>-0.557</b>    |
|       | p       | 0.20             | 0.10             | <b>0.03</b>           | 0.63             | <b>0.003</b>     | 0.12             | <b>0.03</b>      |
| PFUnA | Average | 28.0 (22.0–33.0) | 22.8 (17.0–27.9) | 37.0 (27.5–52.2)      | 20.9 (17.8–29.4) | 22.0 (17.4–29.1) | 27.6 (22.8–34.5) | 22.0 (18.3–30.0) |
|       | r       | 0.282            | 0.163            | -0.456                | <b>-0.644</b>    | -0.372           | -0.504           | -0.152           |
|       | p       | 0.31             | 0.56             | 0.09                  | <b>0.001</b>     | 0.19             | 0.06             | 0.59             |
| PFDoA | Average | 10.4 (8.1–12.2)  | 11.5 (7.5–15.3)  | 11.1 (8.1–14.4)       | 11.3 (8.4–19.0)  | 19.7 (13.7–26.8) | 11.6 (9.2–13.4)  | 18.8 (14.7–27.0) |
|       | r       | -0.001           | 0.118            | <b>0.544</b>          | <b>0.680</b>     | <b>0.542</b>     | -0.005           | -0.291           |
|       | p       | 0.99             | 0.67             | <b>0.04</b>           | <b>0.005</b>     | <b>0.05</b>      | 0.99             | 0.29             |
| PFTrA | Average | 26.4 (13.4–32.9) | 28.9 (19.5–45.1) | 22.7 (14.5–29.3)      | 30.8 (18.9–39.9) | 27.3 (16.9–37.6) | 25.0 (20.1–30.8) | 20.2 (14.7–26.4) |
|       | r       | -0.169           | 0.315            | -0.186                | 0.141            | <b>-0.79</b>     | -0.153           | 0.331            |
|       | p       | 0.55             | 0.25             | 0.51                  | 0.62             | <b>0.0009</b>    | 0.59             | 0.23             |
| PFTeA | Average | 4.9 (3.3–8.1)    | 7.2 (3.2–10.5)   | 5.4 (0–8.4)           | 8.6 (3.1–14.2)   | 11.3 (3.8–16.2)  | 5.1 (2.7–8.0)    | 10.7 (6.2–19.2)  |
|       | r       | -0.188           | -0.081           | <b>0.445</b>          | <b>0.574</b>     | 0.361            | 0.011            | 0.452            |
|       | p       | 0.50             | 0.78             | <b>0.01</b>           | <b>0.03</b>      | 0.20             | 0.97             | 0.09             |
| PFPA  | Average | 2.6 (0–5.4)      | 3.5 (0–8.9)      | 2.8 (0.40–5.0)        | 4.2 (0–8.1)      | 4.4 (0–8.3)      | 2.5 (0.13–6.7)   | 2.5 (0–5.7)      |
|       | r       | 0.008            | -0.055           | -0.007                | 0.229            | 0.262            | 0.247            | <b>0.754</b>     |
|       | p       | 0.98             | 0.85             | 0.98                  | 0.41             | 0.36             | 0.37             | <b>0.001</b>     |

<sup>a</sup> Pearson's coefficient and significance are given for each percent of PFSA/CA to  $\Sigma$ PFSA/CA as a function of year.

<sup>b</sup> Detection of individual PFSA or PFCA was in <60% of the analyzed years, range of percent to the sum concentrations are given.

Note. The bold values indicate that the linear correlations were statistically significant (p<0.05).
